# Supplementary material
Source: publisher site journal article supplement (https://www.spandidos-publications.com/3208/downloadSupplementary)

Figure S1. IUR inhibits HPAC cell invasive and migratory abilities through miR-34a and CD44. Roles of IUR, miR-34a and CD44 in regulating the (A) invasive and (B) migratory abilities of HPAC were examined using Transwell assay. Scale bar=100  $\mu$ m. \*P<0.05. n=3. The data are presented as the mean  $\pm$  standard deviation. C, control; IUR, imatinib-upregulated; miR, microRNA.

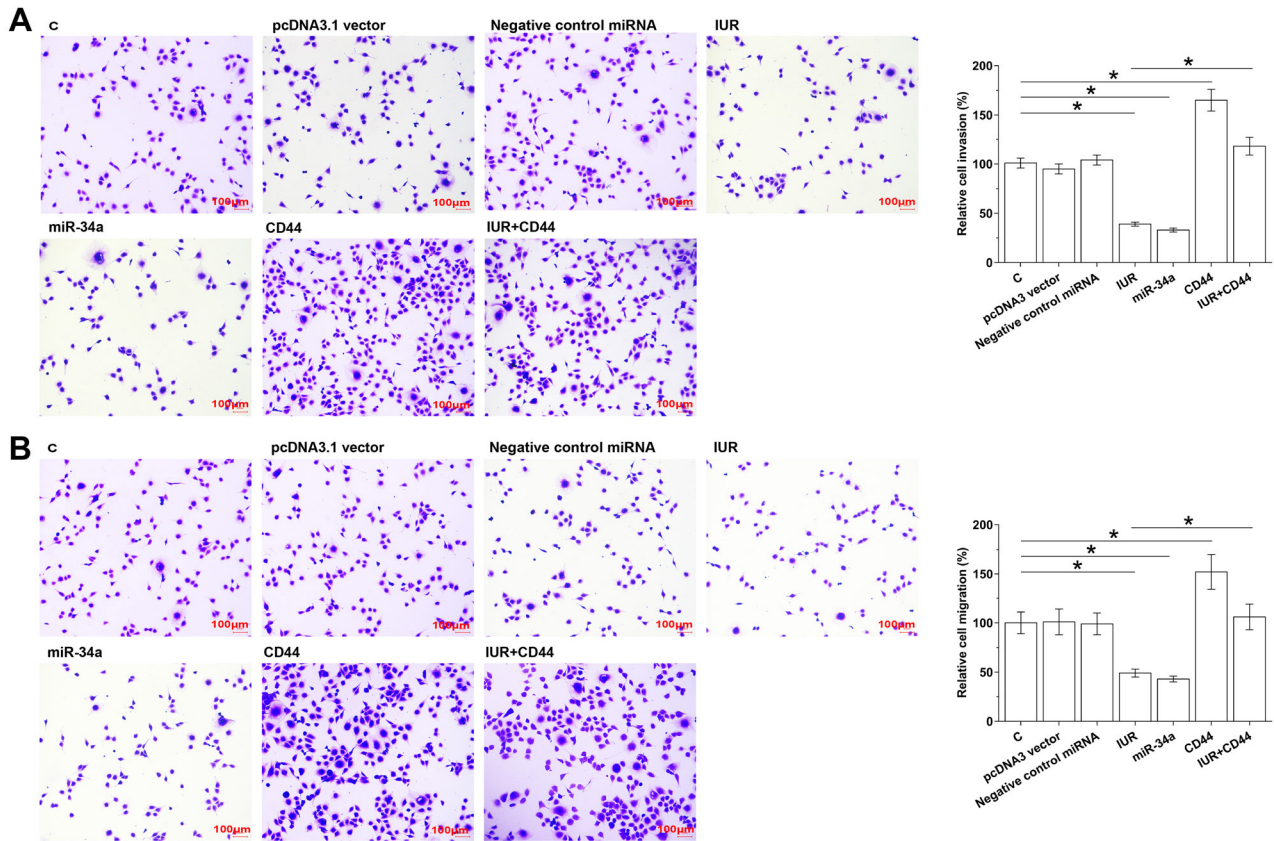

Supplement: Supplementary file 1 [file downloadSupplementary]
